# Supplementary material for: Relationship of Maxillary Sinus Volume and Nasal Septum Deviation: A Cone Beam Computed Tomography Study
Source: MDPI journal article supplement (doi:10.3390/diagnostics14060647), 2024-03-19
Supplement: s1 [file s1]

## Supplemental data

**Tables S1.** Descriptive analysis of the classification of the septal deviation angulations

|                  |      | n   | %      |
|------------------|------|-----|--------|
| Septal Deviation | <9   | 152 | 33.41% |
| Angulation       | 9-15 | 182 | 40.00% |
| Classification   | >15  | 121 | 26.59% |

**Table S2.** Bivariate analysis between the volume of the right and left maxillary sinus with the degrees of septal deviation

|                       | Degrees of Septal Deviation |             |             | p Value |
|-----------------------|-----------------------------|-------------|-------------|---------|
|                       | <9                          | 9-15        | >15         |         |
|                       | Mean                        | Mean        | Mean        |         |
|                       | DS                          | DS          | DS          |         |
| Right Maxillary Sinus | 8.50 ± 2.95                 | 8.10 ± 3.09 | 8.48 ± 3.09 | 0.414   |
| Left Maxillary Sinus  | 8.85 ± 3.05                 | 8.18 ± 3.01 | 8.59 ± 3.26 | 0.149   |
